# Supplementary material for: Circulation timescales of Atlantic Water in the Arctic Ocean determined from anthropogenic radionuclides
Source: Copernicus journal article supplement (doi:10.5194/os-17-111-2021), 2021-01-18
Supplement: Supplementary file 1 [file os-17-111-2021-supplement.zip]

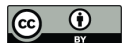

## *Supplement of*

# **Circulation timescales of Atlantic Water in the Arctic Ocean determined from anthropogenic radionuclides**

**Anne-Marie Wefing et al.**

*Correspondence to:* Anne-Marie Wefing ([awefing@phys.ethz.ch](mailto:awefing@phys.ethz.ch)) and Núria Casacuberta ([ncasacuberta@phys.ethz.ch](mailto:ncasacuberta@phys.ethz.ch))

- [os-17-111-2021-supplement-title-page.pdf](#)
- [Table\\_S1\\_corrected.xlsx](#)
- [Table\\_S2\\_corrected.xlsx](#)
- [supplement\\_figures\\_revised.pdf](#)

The copyright of individual parts of the supplement might differ from the CC BY 4.0 License.
